# Supplementary material for: Multiple waves of freshwater colonization of the three-spined stickleback in the Japanese Archipelago
Source: PubMed Central journal article supplement (PMC7641863; doi:10.1186/s12862-020-01713-5), 2020-11-03
Supplement: 12862_2020_1713_MOESM2_ESM.pdf [file 12862_2020_1713_MOESM2_ESM.pdf]

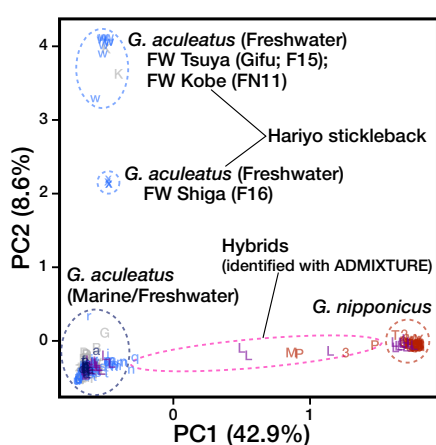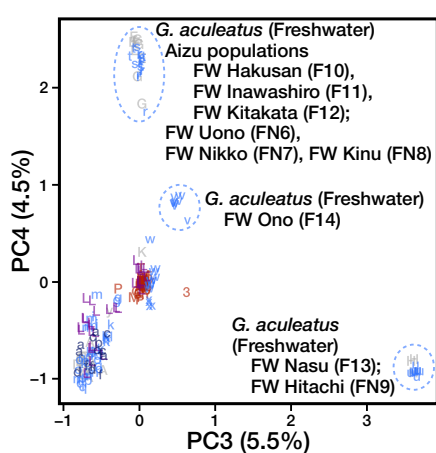

***G. aculeatus* (Marine)**

- a: PO\_Choboshi (P1)  
b: PO\_Watarichippu (P2)  
c: PO\_Tokotan (P3)  
d: PO\_Akkeshi (P4)  
e: PO\_Harutori (P5)  
f: PO\_Fushikobetu (P6)

***G. aculeatus* (Freshwater)**

- g: FW\_Chimikeppu (F1)  
h: FW\_Konuma (F2)  
i: FW\_Junsai (F3)  
k: FW\_Kuji (F4)  
m: FW\_Osanai (F5)  
n: FW\_Fureai (F6)  
o: FW\_Gensui\_2010 (F7)  
p: FW\_Gensui\_2012 (F8)  
q: FW\_Mast (F9)  
r: FW\_Hakusan (F10)  
s: FW\_Inawashiro (F11)  
t: FW\_Kitakata (F12)  
u: FW\_Nasu (F13)  
v: FW\_Ono (F14)  
w: FW\_Tsuya (F15)  
x: FW\_Shiga (F16)

***G. aculeatus* (Freshwater, non-native)**

- y: FW\_Kussharo (FN1)  
z: FW\_Shikotsu (FN2)  
A: FW\_Nishitappu (FN3)  
B: FW\_Aisaka (FN4)  
D: FW\_Towada (FN5)  
E: FW\_Uono (FN6)  
F: FW\_Nikko (FN7)  
G: FW\_Kinu (FN8)  
H: FW\_Hitachi (FN9)  
J: FW\_Komono (FN10)  
K: FW\_Kobe (FN11)

***G. aculeatus* (Marine) / *G. nipponicus***

- L: Okinebe (Oki)

***G. nipponicus***

- M: JS\_Sarufutu (J1)  
N: JS\_Abashiri (J2)  
P: JS\_Biwase (J3)  
Q: JS\_Akkeshi (J4)  
R: JS\_Harutori (J5)  
S: JS\_Onnechikappu (J6)  
T: JS\_Fushikobetu (J7)  
U: JS\_Ogawara (J8)  
Y: JS\_Kuriyama (J9)  
2: JS\_Benkei (J10)  
3: JS\_Notojima (J11)  
4: JS\_Mikata (J12)  
5: JS\_Shinji (J13)
