# Supplementary material for: Multiple waves of freshwater colonization of the three-spined stickleback in the Japanese Archipelago
Source: PubMed Central journal article supplement (PMC7641863; doi:10.1186/s12862-020-01713-5), 2020-11-03

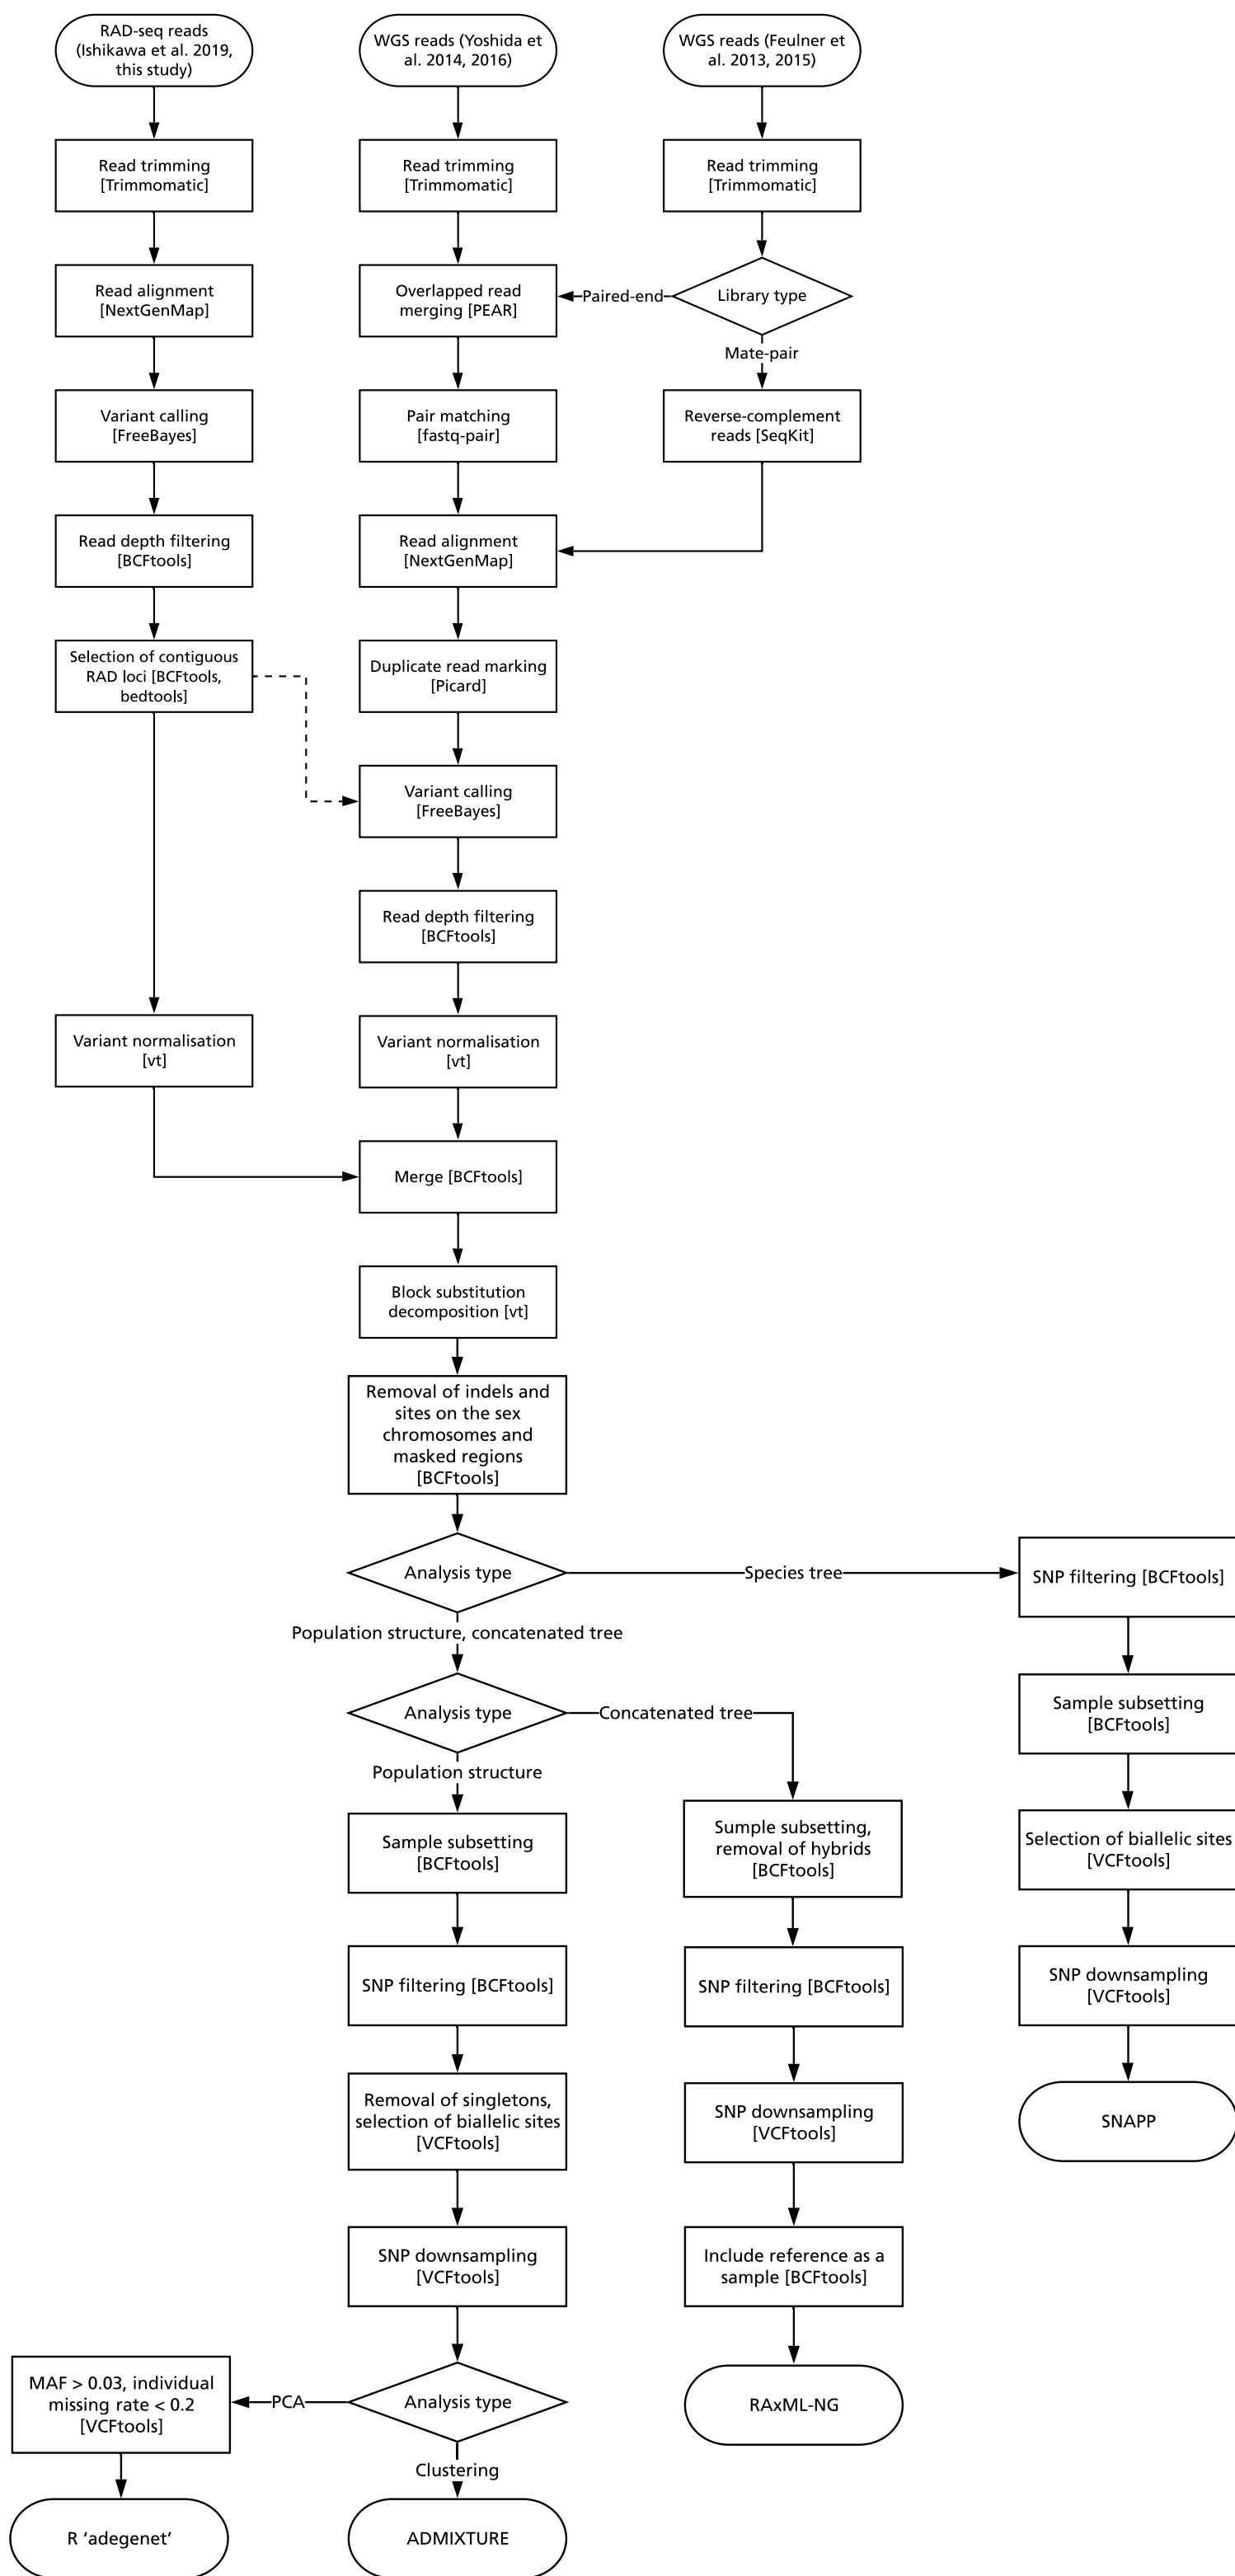

Supplement: 12862_2020_1713_MOESM6_ESM.pdf [file 12862_2020_1713_MOESM6_ESM.pdf]
