# Supplementary material for: Multiple waves of freshwater colonization of the three-spined stickleback in the Japanese Archipelago
Source: BMC Evol Biol. 2020 Nov 3;20:143. doi: 10.1186/s12862-020-01713-5 (PMC7641863; doi:10.1186/s12862-020-01713-5)
Supplement: Supplementary file 4 — Additional file 4: Table S1. Information of collection sites. [file 12862_2020_1713_MOESM4_ESM.xlsx]

## Sheet: Table_S1
Table S1. Information of collection sites.
Population	Population code	Species	Ecotype	Native	Region	Location	Latitude	Longitude	Reference	Collection month and year
PO_Choboshi	P1	Gasterosteus aculeatus	Marine	Yes	Japan	Lake Choboshi	43°15'28.4"N	145°33'21.6"E	Ravinet et al. 2014	May 2012
PO_Watarichippu	P2	Gasterosteus aculeatus	Marine	Yes	Japan	Lake Watarichippu	43°02'11.0"N	145°03'11.5"E	Ravinet et al. 2014	June 2011/May 2012
PO_Tokotan	P3	Gasterosteus aculeatus	Marine	Yes	Japan	Tokotan River	42°59'56.4"N	144°52'04.8"E	Ravinet et al. 2020	Jun 2006
PO_Akkeshi	P4	Gasterosteus aculeatus	Marine	Yes	Japan	Bekanbeushi River, Akkeshi	43°05'56.4"N	144°52'51.6"E	Kitano et al. 2009; Kume et al. 2010	June-July 2006
PO_Harutori	P5	Gasterosteus aculeatus	Marine	Yes	Japan	Lake Harutori	42°58'08.4"N	144°23'45.6"E	Ravinet et al. 2014	May 1999
PO_Fushikobetu	P6	Gasterosteus aculeatus	Marine	Yes	Japan	Fushikobetsu River	42°32'24.0"N	141°19'58.8"E	Ravinet et al. 2018	Jun 2004
FW_Chimikeppu	F1	Gasterosteus aculeatus	Freshwater	Yes	Japan	Lake Chimikeppu	43°37'44.4"N	143°53'06.0"E	Ravinet et al. 2014	May-June 2011
FW_Konuma	F2	Gasterosteus aculeatus	Freshwater	Yes	Japan	Konuma Pond	NA	NA	This study	Sep 2010
FW_Junsai	F3	Gasterosteus aculeatus	Freshwater	Yes	Japan	Lake Junsai	41°59'03.3"N	140°38'12.4"E	This study	Jan 2019
FW_Kuji	F4	Gasterosteus aculeatus	Freshwater	Yes	Japan	Kuji Stream	NA	NA	This study	June 2019
FW_Osanai	F5	Gasterosteus aculeatus	Freshwater	Yes	Japan	Osanai River	39°50'42.9"N	141°57'46.2"E	This study	Dec 2018
FW_Fureai	F6	Gasterosteus aculeatus	Freshwater	Yes	Japan	Teranosawa River	39°21'24.0"N	141°53'01.1"E	Hosoki et al. 2019	Feb 2014
FW_Gensui_2010	F7	Gasterosteus aculeatus	Freshwater	Yes	Japan	Gensui River	39°21'54.0"N	141°53'49.2"E	Kume et al. 2018	Jun 2010
FW_Gensui_2012	F8	Gasterosteus aculeatus	Freshwater	Yes	Japan	Gensui River	39°21'54.0"N	141°53'49.2"E	Ravinet et al. 2014; Kume et al. 2018	Jul 2012
FW_Mast	F9	Gasterosteus aculeatus	Freshwater	Yes	Japan	Namaisawa River	39°21'09.2"N (39°21'13.4"N)	141°53'50.7"E (141°53'35.5"E)	Hosoki et al. 2019	Feb 2014
FW_Hakusan	F10	Gasterosteus aculeatus	Freshwater	Yes	Japan	Hakusannuma Pond	37°30'39.6"N	139°51'57.6"E	Ravinet et al. 2014	May 2009
FW_Inawashiro	F11	Gasterosteus aculeatus	Freshwater	Yes	Japan	Lake Inawashiro	37°29'06.7"N	140°09'18.0"E	This study	Nov 2017
FW_Kitakata	F12	Gasterosteus aculeatus	Freshwater	Yes	Japan	Oshikiri River	37°41'57.5"N	139°52'36.8"E	This study	Nov 2017
FW_Nasu	F13	Gasterosteus aculeatus	Freshwater	Yes	Japan	Nasu	36°49'15.4"N	140°00'30.1"E	Ishikawa et al. 2019	Apr 2012
FW_Ono	F14	Gasterosteus aculeatus	Freshwater	Yes	Japan	Honkanshozu Pond	35°58'31.1"N	136°29'29.6"E	Ishikawa et al. 2019	Dec 2014
FW_Tsuya	F15	Gasterosteus aculeatus	Freshwater	Yes	Japan	Tsuya River	35°15'13.2"N	136°34'10.9"E	Ishikawa et al. 2019	Aug 2011
FW_Shiga	F16	Gasterosteus aculeatus	Freshwater	Yes	Japan	Samegai, Shiga	NA	NA	Ishikawa et al. 2019	Oct 2008/Aug 2009
FW_Kussharo	FN1	Gasterosteus aculeatus	Freshwater	No	Japan	Lake Kussharo	43°36'00.0"N	144°20'52.8"E	Ravinet et al. 2014; Cassidy et al. 2013	May 2003
FW_Shikotsu	FN2	Gasterosteus aculeatus	Freshwater	No	Japan	Lake Shikotsu	42°46'30.0"N	141°24'00.0"E	Ravinet et al. 2014; Cassidy et al. 2013	Oct 2010
FW_Nishitappu	FN3	Gasterosteus aculeatus	Freshwater	No	Japan	Nishitappu River	42°38'45.6"N	141°28'33.6"E	Ravinet et al. 2014	Sep 2010
FW_Aisaka	FN4	Gasterosteus aculeatus	Freshwater	No	Japan	Aisaka Stream	40°35'31.2"N	141°13'15.6"E	Ravinet et al. 2014; Cassidy et al. 2013	Oct 2010
FW_Towada	FN5	Gasterosteus aculeatus	Freshwater	No	Japan	Lake Towada	40°26'42.0"N	140°50'31.2"E	Ravinet et al. 2014; Cassidy et al. 2013	Oct 2010
FW_Uono	FN6	Gasterosteus aculeatus	Freshwater	No	Japan	Uono River	NA	NA	This study	Nov 2018
FW_Nikko	FN7	Gasterosteus aculeatus	Freshwater	No	Japan	Fish Farm in Nikko	36°53'00.9"N	139°34'51.0"E	This study	2019
FW_Kinu	FN8	Gasterosteus aculeatus	Freshwater	No	Japan	Kinu River	36°40'35.9"N	139°56'47.8"E	Ishikawa et al. 2019	Jul 2010
FW_Hitachi	FN9	Gasterosteus aculeatus	Freshwater	No	Japan	Izumigamori Park, Hitachi	36°31'08.6"N	140°37'29.9"E	This study	Jun 2005
FW_Komono	FN10	Gasterosteus aculeatus	Freshwater	No	Japan	Former Fisheries Experiment Station, Komono	35°00'10.6"N	136°32'30.4"E	This study	Feb 2019
FW_Kobe	FN11	Gasterosteus aculeatus	Freshwater	No	Japan	Sumiyoshi River, Kobe	34°44'42.0"N	135°15'29.5"E	This study	Apr 2017
Okinebe	Oki	Gasterosteus aculeatus/Gasterosteus nipponicus	Marine	Yes	Japan	Lake Okinebe	43°20'08.4"N	145°42'14.1"E	This study	Jun 2013
JS_Sarufutu	J1	Gasterosteus nipponicus	Marine	Yes	Japan	Sarufutsu River	45°15'18.0"N	142°14'20.4"E	Ravinet et al. 2014	Jun 2005
JS_Abashiri	J2	Gasterosteus nipponicus	Marine	Yes	Japan	Lake Abashiri	43°57'36.0"N	144°12'00.0"E	Ravinet et al. 2014	May 2008
JS_Biwase	J3	Gasterosteus nipponicus	Marine	Yes	Japan	Biwase Tidepool	43°03'27.0"N	145°04'57.6"E	Ishikawa et al. 2019	Jun 2010
JS_Akkeshi	J4	Gasterosteus nipponicus	Marine	Yes	Japan	Lake Akkeshi	43°04'04.8"N	144°53'02.4"E	Kitano et al. 2009; Kume et al. 2010; Ravinet et al. 2014	Jun-Jul 2006
JS_Harutori	J5	Gasterosteus nipponicus	Marine	Yes	Japan	Lake Haritori	42°58'08.4"N	144°23'45.6"E	Ravinet et al. 2014	Jun 2010
JS_Onnechikappu	J6	Gasterosteus nipponicus	Marine	Yes	Japan	Onnechikappu River	42°57'57.6"N	144°06'57.6"E	Ravinet et al. 2014	Jun 2001
JS_Fushikobetu	J7	Gasterosteus nipponicus	Marine	Yes	Japan	Fushikobetsu River	42°32'24.0"N	141°19'58.8"E	Ravinet et al. 2018	Jun 2004
JS_Ogawara	J8	Gasterosteus nipponicus	Marine	Yes	Japan	Lake Ogawara	40°50'24.0"N	141°22'19.2"E	Ravinet et al. 2014	Mar 2002
JS_Kuriyama	J9	Gasterosteus nipponicus	Marine	Yes	Japan	Kuriyama River	35°36'54.0"N	140°31'51.6"E	Kume et al. 2010	Feb-Apr 2005/Mar 2006
JS_Benkei	J10	Gasterosteus nipponicus	Marine	Yes	Japan	Cape Benkei	42°49'28.1"N	140°11'16.2"E	Ishikawa et al. 2019	Jun 2018
JS_Notojima	J11	Gasterosteus nipponicus	Marine	Yes	Japan	Notojima Estuary	37°07'37.2"N	137°02'38.4"E	Ravinet et al. 2014	May 2007
JS_Mikata	J12	Gasterosteus nipponicus	Marine	Yes	Japan	Lake Mikata	35°36'54.0"N	140°31'51.6"E	Ishikawa et al. 2019	Mar 2011
JS_Shinji	J13	Gasterosteus nipponicus	Marine	Yes	Japan	Lake Shinji	35°27'00.0"N	132°57'36.0"E	Ishikawa et al. 2019	Mar 2014
Little_Campbell_Marine	-	Gasterosteus aculeatus	Marine	Yes	East Pacific	Estuary of Little Campbell River	49°00'58.6"N	122°46'45.7"W	Kitano et al. 2010	Jun 2004
Little_Campbell_Stream	-	Gasterosteus aculeatus	Freshwater	Yes	East Pacific	Upstream of Little Campbell River	49°00'43.6"N	122°37'29.7"W	Kitano et al. 2010	May 2004
Duwamish	-	Gasterosteus aculeatus	Marine	Yes	East Pacific	Esturay of Duwamish River	47°31'53.4"N	122°19'09.5"W	Kitano et al. 2008	May-June 2006
Big_Soos	-	Gasterosteus aculeatus	Freshwater	Yes	East Pacific	Big Soos Creek	47°22'29.3"N	122°08'38.8"W	Kitano et al. 2010	May-June 2005
Malenter_Au	-	Gasterosteus aculeatus	Freshwater	Yes	Europe	Malenter Au	54°12'15.08"N	10°33'41.90"E	Feulner et al. 2015	May 2010
Grosser_Ploener_See	-	Gasterosteus aculeatus	Freshwater	Yes	Europe	Grosser Ploener See	54° 9'21.61"N	10°25'48.52"E	Feulner et al. 2015	May 2010
Eider	-	Gasterosteus aculeatus	Freshwater	Yes	Europe	Eider	54° 09' 58.07'' N	10° 04' 31.05'' E	Feulner et al. 2015	May 2010
Westensee	-	Gasterosteus aculeatus	Freshwater	Yes	Europe	Westensee	54°16'39.70"N	9°55'41.04"E	Feulner et al. 2015	May 2010
Lemvig	-	Gasterosteus aculeatus	Marine	Yes	Europe	Lemvig	56°36′9.19″N	8°18′1.94″E	Feulner et al. 2013	Sep 2010
Orraelva	-	Gasterosteus aculeatus	Freshwater	Yes	Europe	Orraelva	60° 15' 19.33"N	5° 55' 35.68"E	Feulner et al. 2015	Sep 2010
Skogseidvatn	-	Gasterosteus aculeatus	Freshwater	Yes	Europe	Skogseidvatn	60° 14' 41.57"N	5° 54' 55.39"E	Feulner et al. 2015	Sep 2010
G_wheatlandi	-	Gasterosteus wheatlandi	Marine	Yes	American Northeast	Demarest Lloyd State Park	NA	NA	Yoshida et al. 2014	2007
NA, not available
